# Supplementary material for: Adapted Sequential Extraction Protocol to Study Mercury Speciation in Gold Mining Tailings: Implications for Environmental Contamination in the Amazon
Source: MDPI journal article supplement (doi:10.3390/toxics12050326), 2024-04-30
Supplement: s1 [file s1]

## Supplementary figures and tables

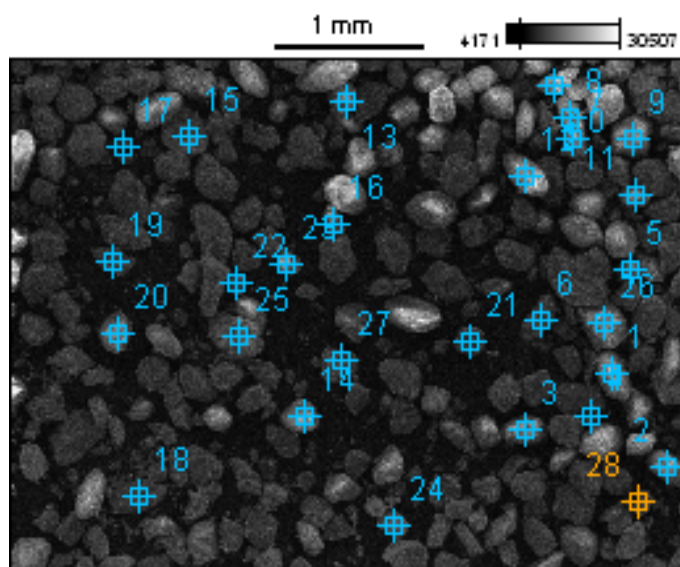

**Figure S1** – SEM image of the tailings sample with targeted spots represented in points where EDS analysis was performed.

**Table S1** - Analytical parameters of mercury determination

|                                        | F1                             | F2                             | F3                             | F4                |
|----------------------------------------|--------------------------------|--------------------------------|--------------------------------|-------------------|
| Curve's equation                       | $y = 300.23x + 199.62$         | $y = 252.95 + 66.41$           | $y = 323.64 - 419.7$           | $326.78x + 43.58$ |
| Coefficient of determination ( $R^2$ ) | 0.999                          | 0.999                          | 0.995                          | 0.999             |
| LD                                     | $0.2 \mu\text{g.L}^{-1}$       | $0.3 \mu\text{g.L}^{-1}$       | $1.3 \mu\text{g.L}^{-1}$       | 0.08 ng           |
| Linear range of work                   | 0.2 to $80 \mu\text{g.L}^{-1}$ | 0.3 to $80 \mu\text{g.L}^{-1}$ | 1.3 to $80 \mu\text{g.L}^{-1}$ | 0.08 to 25.23 ng  |

Concentrations in F1, F2 and F3 were determined by cold vapor atomic absorption spectroscopy (CVAAS).

Concentrations in F4 were determined by thermal desorption atomic absorption spectroscopy (TDAAS).

**Table S2** - EDS results in % weight of each element.

| Point | O     | F | Mg | Al    | Si    | P     | K | Ti    | Fe    | Zr    | Sn   | La    | Ce    | Hg   | Th   |
|-------|-------|---|----|-------|-------|-------|---|-------|-------|-------|------|-------|-------|------|------|
| 1     | 40.31 | 0 | 0  | 1.81  | 15.13 | 4.88  | 0 | 0.67  | 4.69  | 29.02 | 0    | 0     | 0.51  | 1.51 | 1.49 |
| 2     | 37.69 | 0 | 0  | 5.98  | 14.31 | 11.12 | 0 | 0.61  | 16.41 | 9.11  | 0    | 0     | 2.06  | 0    | 2.72 |
| 3     | 32.63 | 0 | 0  | 0.25  | 14.33 | 2.14  | 0 | 0.75  | 3.49  | 36.88 | 0.65 | 3.35  | 0.81  | 0    | 4.7  |
| 4     | 0     | 0 | 0  | 0     | 11.62 | 3.45  | 0 | 10.28 | 49.17 | 25.48 | 0    | 0     | 0     | 0    | 0    |
| 5     | 27.74 | 0 | 0  | 0     | 22.83 | 3.29  | 0 | 2.52  | 0     | 43.62 | 0    | 0     | 0     | 0    | 0    |
| 6     | 30.18 | 0 | 0  | 0     | 1.17  | 0     | 0 | 31.8  | 30.4  | 0     | 0.59 | 2.19  | 3.67  | 0    | 0    |
| 7     | 41.46 | 0 | 0  | 21.12 | 14.68 | 1.58  | 0 | 0.6   | 15.58 | 3.18  | 0    | 0.87  | 0     | 0.94 | 0    |
| 8     | 42.93 | 0 | 0  | 3.76  | 11.97 | 2.86  | 0 | 0     | 14.38 | 19.53 | 0    | 0     | 2.92  | 1.64 | 0    |
| 9     | 33.89 | 0 | 0  | 0.31  | 13.34 | 3.77  | 0 | 0.55  | 2.1   | 45.17 | 0    | 0     | 0.5   | 0.29 | 0.08 |
| 10    | 38.01 | 0 | 0  | 1.38  | 2.25  | 11.55 | 0 | 1.57  | 17.05 | 0     | 0    | 2.71  | 20.35 | 0    | 5.12 |
| 11    | 38.57 | 0 | 0  | 3.42  | 12.64 | 1.63  | 0 | 0.77  | 18.17 | 21.99 | 0    | 1.51  | 1.31  | 0    | 0    |
| 12    | 38.97 | 0 | 0  | 0.33  | 12.08 | 2.77  | 0 | 0     | 2.09  | 43.76 | 0    | 0     | 0     | 0    | 0    |
| 13    | 32.48 | 0 | 0  | 1.14  | 2.87  | 12.36 | 0 | 0     | 6.1   | 0     | 1.33 | 12.67 | 28.23 | 0    | 2.82 |

|           |              |          |          |             |              |             |          |             |              |              |              |             |          |             |             |
|-----------|--------------|----------|----------|-------------|--------------|-------------|----------|-------------|--------------|--------------|--------------|-------------|----------|-------------|-------------|
| 14        | 37.19        | 0        | 0        | 0.53        | 0.68         | 14.68       | 0        | 0           | 2.76         | 0            | 0.63         | 8.88        | 29.38    | 0           | 5.26        |
| <b>15</b> | <b>26.52</b> | <b>0</b> | <b>0</b> | <b>0.66</b> | <b>1.51</b>  | <b>0.44</b> | <b>0</b> | <b>0</b>    | <b>2.35</b>  | <b>0.15</b>  | <b>65.21</b> | <b>0</b>    | <b>0</b> | <b>0.71</b> | <b>2.45</b> |
| <b>16</b> | <b>39.42</b> | <b>0</b> | <b>0</b> | <b>3.91</b> | <b>15.09</b> | <b>4.2</b>  | <b>0</b> | <b>0</b>    | <b>9.39</b>  | <b>25.93</b> | <b>0</b>     | <b>0</b>    | <b>0</b> | <b>2.06</b> | <b>0</b>    |
| 17        | 25.14        | 0        | 0        | 0.27        | 15.39        | 3.29        | 0        | 0.77        | 6.28         | 42.61        | 0            | 3.61        | 2.64     | 0           | 0           |
| 18        | 27.46        | 1.55     | 0        | 1.39        | 0.31         | 0.32        | 0        | 0.33        | 65.58        | 0            | 1.35         | 1.7         | 0        | 0           | 0           |
| <b>19</b> | <b>36.08</b> | <b>0</b> | <b>0</b> | <b>0.97</b> | <b>1.76</b>  | <b>0.45</b> | <b>0</b> | <b>0.62</b> | <b>54.07</b> | <b>1.54</b>  | <b>0.95</b>  | <b>3.11</b> | <b>0</b> | <b>0.48</b> | <b>0</b>    |
| <b>20</b> | <b>40.26</b> | <b>0</b> | <b>0</b> | <b>0</b>    | <b>11.87</b> | <b>2.43</b> | <b>0</b> | <b>0.27</b> | <b>4.35</b>  | <b>36.84</b> | <b>2.27</b>  | <b>0</b>    | <b>0</b> | <b>1.72</b> | <b>0</b>    |
| <b>21</b> | <b>25.13</b> | <b>0</b> | <b>0</b> | <b>0.08</b> | <b>0.06</b>  | <b>0</b>    | <b>0</b> | <b>0</b>    | <b>72.64</b> | <b>0</b>     | <b>0.44</b>  | <b>0</b>    | <b>0</b> | <b>0.87</b> | <b>0.78</b> |
| <b>22</b> | <b>38.21</b> | <b>0</b> | <b>0</b> | <b>0.78</b> | <b>12.86</b> | <b>3.68</b> | <b>0</b> | <b>1.31</b> | <b>9.52</b>  | <b>32.02</b> | <b>0</b>     | <b>0</b>    | <b>0</b> | <b>1.47</b> | <b>0.15</b> |
| <b>23</b> | <b>27.49</b> | <b>0</b> | <b>0</b> | <b>0.29</b> | <b>15.84</b> | <b>4.53</b> | <b>0</b> | <b>0</b>    | <b>1.68</b>  | <b>48.59</b> | <b>0.82</b>  | <b>0</b>    | <b>0</b> | <b>0.76</b> | <b>0</b>    |
| 24        | 36.41        | 0        | 0        | 0.75        | 20.56        | 2.66        | 0        | 2.5         | 6.83         | 29.98        | 0            | 0           | 0        | 0           | 0.31        |
| <b>25</b> | <b>52.68</b> | <b>0</b> | <b>0</b> | <b>0.7</b>  | <b>41.04</b> | <b>0.34</b> | <b>0</b> | <b>0.59</b> | <b>0.86</b>  | <b>0</b>     | <b>1.1</b>   | <b>0</b>    | <b>0</b> | <b>1.59</b> | <b>1.1</b>  |
| 26        | 50.79        | 0        | 3.08     | 10.9        | 20.32        | 0.05        | 4.79     | 0.77        | 4.11         | 0            | 1.76         | 0           | 2.28     | 0           | 1.17        |
| 27        | 49.61        | 0        | 2.81     | 9.35        | 22.07        | 0           | 4.04     | 0.37        | 9.79         | 0.11         | 1.39         | 0.46        | 0        | 0           | 0           |
| <b>28</b> | <b>47.94</b> | <b>0</b> | <b>0</b> | <b>0</b>    | <b>39.23</b> | <b>0.41</b> | <b>0</b> | <b>0.11</b> | <b>7.03</b>  | <b>1.98</b>  | <b>0.46</b>  | <b>0.72</b> | <b>0</b> | <b>1.62</b> | <b>0.51</b> |

Rows in bold are the points containing Hg in its chemical composition. Points 2, 10, 13 and 14 have chemical compositions close to that of monazite.

**Table S3** - Major elements concentration in the ASGM tailings sample

| Concentration (%) |                    |
|-------------------|--------------------|
| Fe                | 21.56 <sup>1</sup> |
| Zr                | 13.92 <sup>1</sup> |
| Si                | 12.71 <sup>1</sup> |
| Ti                | 6.33 <sup>1</sup>  |
| Al                | 0.81 <sup>1</sup>  |
| P                 | 0.60 <sup>1</sup>  |
| Mn                | 0.32 <sup>1</sup>  |
| Ca                | 0.21 <sup>1</sup>  |
| Mg                | 0.16 <sup>1</sup>  |
| K                 | 0.53 <sup>2</sup>  |
| Na                | 0.07 <sup>2</sup>  |

1 – determined by ICP-OES; 2 – determined by ICP-MS.

**Table S4** - Elements concentration in the first three sequential extraction procedure steps

|    | F1 (mg.kg <sup>-1</sup> ) | F2 (mg.kg <sup>-1</sup> ) | F3 (mg.kg <sup>-1</sup> ) |
|----|---------------------------|---------------------------|---------------------------|
| Na | 13 ± 1                    | 7 ± 1                     | 2.1 ± 0.7                 |
| K  | 206 ± 7                   | 37 ± 2                    | <LD                       |
| Al | 125 ± 4                   | 512 ± 6                   | 385 ± 9                   |
| P  | 12 ± 3                    | 319 ± 2                   | 146 ± 7                   |

|    |                 |                |                 |
|----|-----------------|----------------|-----------------|
| Si | $119.5 \pm 0.3$ | $192 \pm 4$    | $164 \pm 5$     |
| Mg | $51 \pm 2$      | $209 \pm 9$    | $134 \pm 3$     |
| Mn | $65.3 \pm 0.4$  | $369 \pm 3$    | $62.0 \pm 0.4$  |
| Ti | <LD             | $49.0 \pm 0.2$ | $154 \pm 1$     |
| Fe | $36.9 \pm 0.2$  | $7987 \pm 320$ | $22185 \pm 107$ |
| Zr | <LD             | $36.3 \pm 0.2$ | $10.4 \pm 0.1$  |

Concentrations are presented accompanied by their corresponding confidence interval at a 95% confidence level.
